# Supplementary material
Source: MDPI journal article supplement (https://www.mdpi.com/2073-4395/11/11/2332)
Supplement: s1 [file s1 › agronomy-1439141-supplementary.pdf]

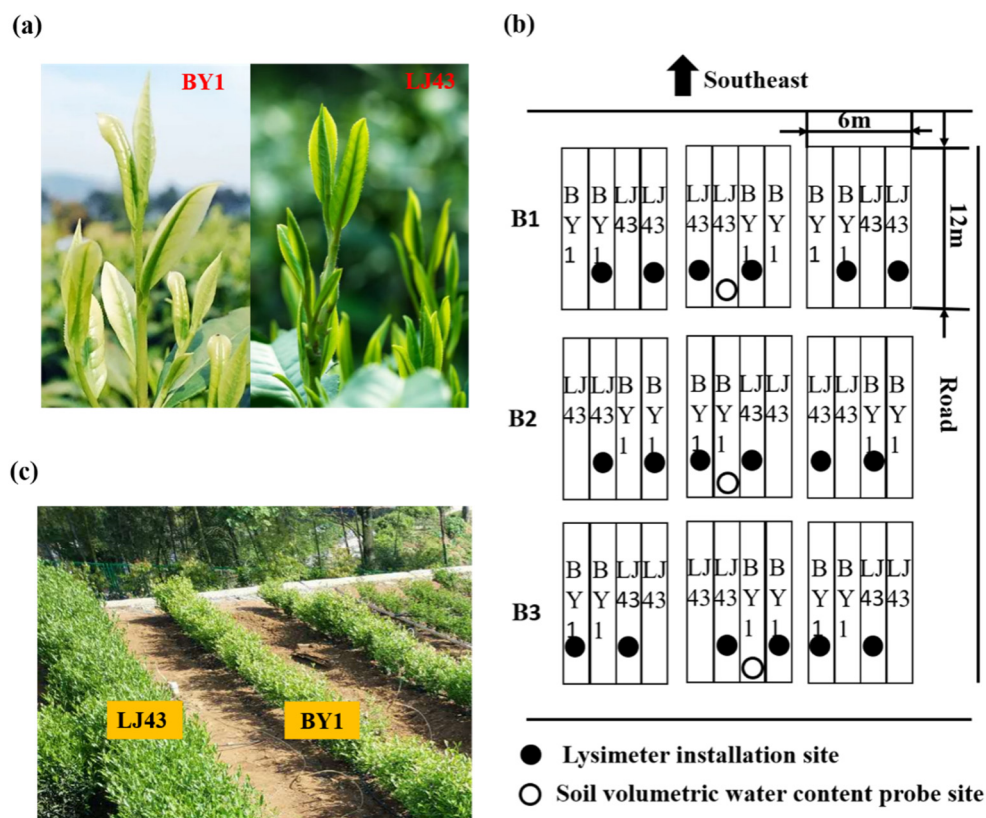

**Figure S1.** (a) Original images of BY1 and LJ43, (b) Illustration of experiment layout, lysimeter installation and soil volumetric water content probe site, and (c) Tea bushes on the study site.

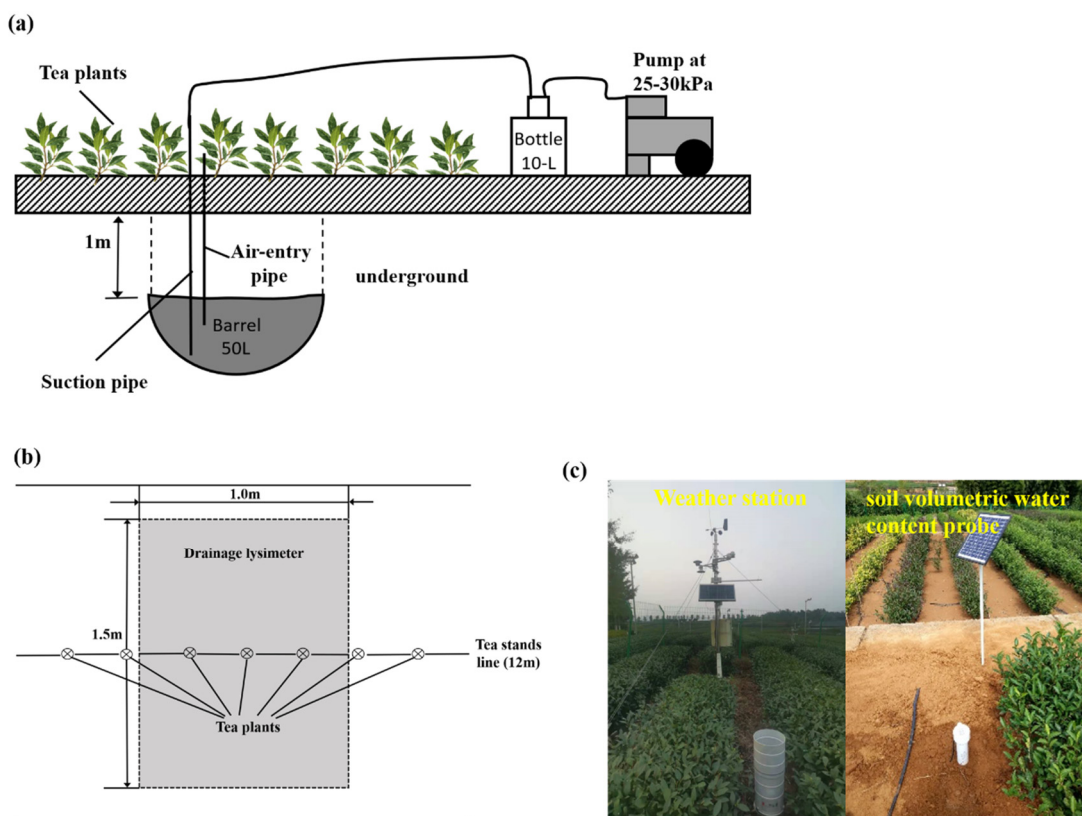

**Figure S2.** (a) Illustrations of lysimeter and leachate collecting from lysimeter, (b) Top view of lysimeter installed, (c) Illustrations of the weather station and soil volumetric water content probe.
